# Supplementary material for: Nephroprotective Effects of Cardamonin on Renal Ischemia Reperfusion Injury/UUO-Induced Renal Fibrosis
Source: PubMed Central journal article supplement — J Agric Food Chem. 2023 Aug 30;71(36):13284–303. doi: 10.1021/acs.jafc.3c01880 (PMC10510707; doi:10.1021/acs.jafc.3c01880), 2023-08-30
Supplement: jf3c01880_si_001.pdf [file jf3c01880_si_001.pdf]

## **Nephroprotective effects of cardamonin on renal ischemia reperfusion injury/ UUO-induced renal fibrosis**

Banghua Zhang<sup>1,2,3, #</sup>, Zhi-Yuan Chen<sup>1,2, #</sup>, Zhengyu Jiang<sup>1,2</sup>, Shiyu Huang<sup>1,2,3</sup>, Xiu-Heng Liu<sup>1,2, \*</sup>, and Lei Wang<sup>1,2, \*</sup>

<sup>1</sup> Department of Urology, Renmin Hospital of Wuhan University, Wuhan 430060, China

<sup>2</sup> Wuhan University Institute of Urological Disease, Wuhan 430060, China

<sup>3</sup> Hubei Key Laboratory of Digestive System Disease, Wuhan 430060, China

# Banghua Zhang and Zhi-Yuan Chen contributed equally to this work

\*Correspondence should be addressed to Xiu-Heng Liu; [drliuxh@hotmail.com](mailto:drliuxh@hotmail.com), and Lei Wang; [drwanglei@whu.edu.cn](mailto:drwanglei@whu.edu.cn)

**Table S1: The primer sequences of human genes used in quantitative real-time PCR analysis**

| Primer         | Forward Primer (5' -> 3') | Reverse Primer (5' -> 3') | Amplicon Size (bp) |
|----------------|---------------------------|---------------------------|--------------------|
| Collagen I     | GAGGGCCAAGACGAAGACATC     | CAGATCACGTCATCGCACAAAC    | 140                |
| Collagen III   | GCCAAATATGTGTCTGTGACTCA   | GGGCGAGTAGGAGCAGTTG       | 145                |
| Fibronectin    | CCGCCGAATGTAGGACAAGA      | TGTCAGAGTGGCACTGGTAG      | 159                |
| $\alpha$ -SMA  | CAAGTCCTCCAGCGTTCTGA      | GCTTCACAGGATCCCGTCTT      | 196                |
| TNF- $\alpha$  | CCTCTCTCTAATCAGCCCTCTG    | GAGGACCTGGGAGTAGATGAG     | 220                |
| IL-6           | TTCTCCACAAGCGCCTTC        | AGAGGTGAGTGGCTGTCTGT      | 138                |
| IL-1 $\beta$   | ATGATGGCTTATTACAGTGCCAA   | GTCGGAGATTCGTAGCTGGA      | 132                |
| GAPDH          | GGAGCGAGATCCCTCCAAAAT     | GGCTGTTGCATACTTCTCATGG    | 197                |
| $\beta$ -actin | GCCGCCAGCTCACCAT          | TCGTGCCACATAGGAATC        | 184                |

**Supplementary Table S1.** The primer sequences of human genes used in quantitative real-time PCR analysis.

**Table S2: The primer sequences of mouse genes used in quantitative real-time PCR analysis**

| Primer         | Forward Primer (5' -> 3') | Reverse Primer (5' -> 3') | Amplicon Size (bp) |
|----------------|---------------------------|---------------------------|--------------------|
| NGAL           | TGGCCCTGAGTGCATGTG        | CTCTTGAGCTCATAGATGGTGC    | 239                |
| KIM-1          | GTAAACCAGAGATTCCCACACG    | TCTCATGGGGACAAAATGTAGTG   | 196                |
| Collagen I     | GCTCCTTTAGGGGCCACT        | CCACGTCTACCAATTGGGG       | 103                |
| Collagen III   | CTGTAAACATGGAACTGGGGAAA   | CCATAGCTGAACTGAAAACCACC   | 144                |
| Fibronectin    | ATGTGGACCCCTCCTGATAGT     | GCCCAGTGATTTTCAGCAAAGG    | 124                |
| $\alpha$ -SMA  | GTCCCAGACATCAGGGAGTAA     | TCGGATACTTCAGCGTCAGGA     | 102                |
| TNF- $\alpha$  | CCTGTAGCCCACGTCTGTAG      | GGGAGTAGACAAGGTACAACCC    | 148                |
| IL-6           | TAGTCCTTCCTACCCCAATTCC    | TTGGTCCTTAGCCACTCCTTC     | 76                 |
| IL-1 $\beta$   | GCAACTGTTCCCTGAACTCAACT   | ATCTTTTGGGGTCCGCAACT      | 89                 |
| GAPDH          | AGGTCGGTGTGAACGGATTG      | TGTAGACCATGTAGTTGAGGTCA   | 123                |
| $\beta$ -actin | GGCTGTATTCCCCTCCATCG      | CCAGTTGGTAACAATGCCATGT    | 154                |

**Supplementary Table S2.** The primer sequences of mouse genes used in quantitative real-time PCR analysis.

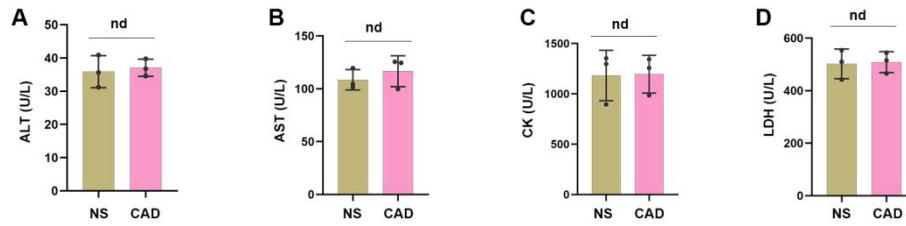

**Supplementary Figure 1. 100mg/kg/d of cardamomin by continuous gavage for 7 d had no obvious toxicity on liver and heart function in mice.** (A-B) The influence about CAD on the levels of ALT and AST in normally fed eight-week-old C57BL/6 mice. (C-D) The influence about CAD on the levels of CK and LDH in normally fed eight-week-old C57BL/6 mice. Values measured during animal experiments were carried out as mean  $\pm$  SD, n=3. nd, no statistical difference; NS, sterile saline; CAD, cardamomin; ALT, alanine transaminase; AST, aspartate transaminase; CK, creatine kinase; LDH, lactic dehydrogenase.
